# Supplementary material
Source: Springer Nature journal article supplement (https://www.springermedizin.de/resource/supplementary/13054_2009_8354_MOESM2_ESM.pdf/9731778)

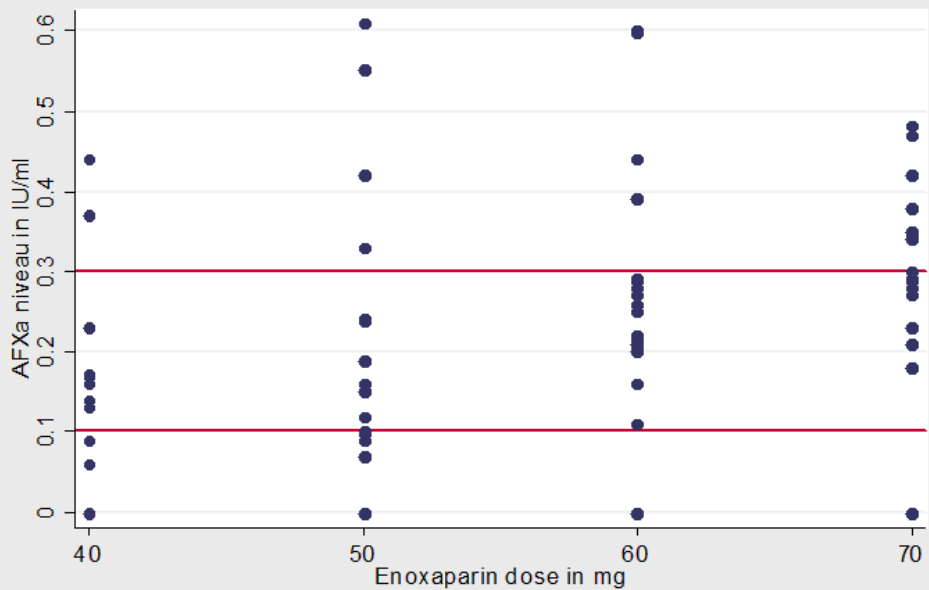

Supplement: MOESM2 [file 9731778]
